# Supplementary material
Source: publisher figshare collection journal article supplement (https://gsajournals.figshare.com/ndownloader/files/18726506)
Supplement: Supplementary file 1 [file 18726506]

## Sheet: Sheet1
Supplemental Table S1. Phenotypic variation in parents and F₂ subpopulations.
Category	Trait	Population	Pedigree	Mean	SD	Min.	Max.	CV%	N
Plant Architecture	Plant Height (PH; mm)	Arizona	Acala Maxxa	779	94.12	681	955	12.08	8
		Arizona	TX2094	1544.56	178.81	1338	1809	11.58	9
		Arizona	(TX2094xAcala Maxxa)F₂	1150.24	277.47	464	2041	24.12	232
		Iowa	(TX2094xAcala Maxxa)F₂	1584.58	239.07	802	2130	15.09	227
	Fruiting Branch Length for 1st Branch (FB1; mm)	Arizona	Acala Maxxa	40.75	27.14	10	80	66.6	8
		Arizona	TX2094	20.78	11.64	8	42	56.01	9
		Arizona	(TX2094xAcala Maxxa)F₂	21.03	10.43	1	59	49.62	223
		Iowa	(TX2094xAcala Maxxa)F₂	5.66	1.79	1.5	10	31.69	220
	Fruiting Branch Length for 3rd Branch (FB2; mm)	Arizona	Acala Maxxa	152.88	56.26	96	255	36.8	8
		Arizona	TX2094	98.89	44.79	36	153	45.29	9
		Arizona	(TX2094xAcala Maxxa)F₂	114.32	34.58	28	231	30.25	225
		Iowa	(TX2094xAcala Maxxa)F₂	45.25	22.06	3	180	48.76	219
	Fruiting Branch Length for 5th Branch (FB3; mm)	Arizona	Acala Maxxa	187.13	32.48	121	228	17.36	8
		Arizona	TX2094	171	65.74	68	259	38.45	9
		Arizona	(TX2094xAcala Maxxa)F₂	171.49	52.6	63	315	30.67	225
		Iowa	(TX2094xAcala Maxxa)F₂	125.72	42.35	17	271	33.68	220
	Ratio of PH to FB1 (PHFB1)	Arizona	Acala Maxxa	30.82	23.51	8.51	79.6	76.29	8
		Arizona	TX2094	96.4	48.84	41.11	180.75	50.67	9
		Arizona	(TX2094xAcala Maxxa)F₂	71.98	71.34	0	792	99.1	225
		Iowa	(TX2094xAcala Maxxa)F₂	312.52	119.69	138.75	757.5	38.3	219
	Ratio of PH to FB2 (PHFB2)	Arizona	Acala Maxxa	5.64	1.95	3.37	8.63	34.53	8
		Arizona	TX2094	18.88	8.96	10.5	37.69	47.49	9
		Arizona	(TX2094xAcala Maxxa)F₂	11.09	4.32	0	32.45	38.92	225
		Iowa	(TX2094xAcala Maxxa)F₂	43.56	24.18	8.22	156.38	55.52	217
	Ratio of PH to FB3 (PHFB3)	Arizona	Acala Maxxa	4.26	0.76	3.51	5.71	17.83	8
		Arizona	TX2094	10.35	4.31	6.2	19.96	41.62	9
		Arizona	(TX2094xAcala Maxxa)F₂	7.3	2.4	0	16.96	32.9	225
		Iowa	(TX2094xAcala Maxxa)F₂	13.72	5	4.57	33.7	36.44	215
	Branch Angle of 5th Sympodium (BA; °)	Arizona	Acala Maxxa	23	9.08	10	35	39.49	5
		Arizona	TX2094	22.22	6.18	10	30	27.81	9
		Arizona	(TX2094xAcala Maxxa)F₂	20.77	6.55	5	45	31.51	226
		Iowa	(TX2094xAcala Maxxa)F₂	78.52	12.85	35	120	16.36	220
	Node with Red Branch	Iowa	(TX2094xAcala Maxxa)F₂	23.83	3.69	15	34	15.5	103
	Average Stem Pubescence (SP)	Arizona	Acala Maxxa	4.39	0.33	4	5	7.59	9
		Arizona	TX2094	1	0	1	1	0	9
		Arizona	(TX2094xAcala Maxxa)F₂	2.71	1.16	1	5	42.9	234
		Iowa	(TX2094xAcala Maxxa)F₂	3.46	1.27	1	5	36.76	231
Fruiting habit	Total Number of Nodes (TN)	Arizona	Acala Maxxa	17.11	2.8	11	20	16.39	9
		Arizona	TX2094	46.78	4.74	40	53	10.13	9
		Arizona	(TX2094xAcala Maxxa)F₂	31.59	4.34	19	44	13.75	234
		Iowa	(TX2094xAcala Maxxa)F₂	34	3.91	21	45	11.51	227
	Ratio of PH to TN (PHTN)	Arizona	Acala Maxxa	43.58	5.24	38.39	56.18	12.01	9
		Arizona	TX2094	33.38	5.43	26.1	40.39	16.26	9
		Arizona	(TX2094xAcala Maxxa)F₂	36.29	6.8	17.85	60.54	18.74	232
		Iowa	(TX2094xAcala Maxxa)F₂	46.88	6.87	29	66.25	14.66	227
	Total Number of Nodes to First Fruiting Branch (NF)	Arizona	Acala Maxxa	4.63	0.52	4	5	11.19	8
		Arizona	TX2094	9.78	3.42	5	17	34.97	9
		Arizona	(TX2094xAcala Maxxa)F₂	6.88	1.43	4	12	20.76	233
		Iowa	(TX2094xAcala Maxxa)F₂	13.72	4.8	1	28	35.02	225
	Total Number of Non-Fruiting Branches (TNFB)	Arizona	Acala Maxxa	6.22	1.48	4	8	23.81	9
		Arizona	TX2094	19.22	5.59	12	28	29.06	9
		Arizona	(TX2094xAcala Maxxa)F₂	10.26	2.92	1	28	28.45	234
		Iowa	(TX2094xAcala Maxxa)F₂	16.05	3.41	8	29	21.23	225
	Total Number of Fruiting Branches (TFB)	Arizona	Acala Maxxa	10.89	2.15	7	14	19.72	9
		Arizona	TX2094	27.56	3.28	22	32	11.91	9
		Arizona	(TX2094xAcala Maxxa)F₂	21.32	4.56	6	34	21.4	234
		Iowa	(TX2094xAcala Maxxa)F₂	17.87	4.24	4	25	23.73	226
	Total Number of Newly Produced Nodes during 30-day Interval	Iowa	(TX2094xAcala Maxxa)F₂	5.04	1.87	0	11	37.03	213
	Total Number of Fruiting Branches after 30-day Interval	Iowa	(TX2094xAcala Maxxa)F₂	5.96	3.24	0	13	54.31	218
Phenology	Days to First Flower (FF)	Arizona	Acala Maxxa	60.33	2.18	58	63	3.61	9
		Arizona	TX2094	92.17	23.74	76	135	25.76	6
		Arizona	(TX2094xAcala Maxxa)F₂	69.03	6.88	57	104	9.97	234
		Iowa	(TX2094xAcala Maxxa)F₂	154.56	20.95	118	294	13.55	225
	Total Number of Nodes at FF (TNFF)	Iowa	(TX2094xAcala Maxxa)F₂	34.09	4.63	24	50	13.57	222
	Total Number of Nodes to Fruting Branch at FF	Iowa	(TX2094xAcala Maxxa)F₂	21.52	4.06	9	37.5	18.85	222
	Total Number of Fruiting Branches at FF	Iowa	(TX2094xAcala Maxxa)F₂	17.16	4.07	6	30	23.74	222
	Total Number of Flowers during 30-day Interval	Arizona	Acala Maxxa	2.67	1.73	1	6	64.95	9
		Arizona	TX2094	1.11	1.54	0	4	138.29	9
		Arizona	(TX2094xAcala Maxxa)F₂	7.57	3.81	0	22	50.36	234
		Iowa	(TX2094xAcala Maxxa)F₂	19.73	11.25	1	53	57.01	226
	Average Number of Flowers/Day	Arizona	Acala Maxxa	0.09	0.06	0.03	0.2	64.95	9
		Arizona	TX2094	0.08	0.04	0.03	0.13	51.64	4
		Arizona	(TX2094xAcala Maxxa)F₂	0.26	0.12	0.07	0.73	48.54	231
		Iowa	(TX2094xAcala Maxxa)F₂	0.66	0.38	0.03	1.77	57.07	226
	Total Number of Open Bolls Retained after 30 Days + 4 Week Interval	Arizona	(TX2094xAcala Maxxa)F₂	2.52	2.48	0	12	98.31	230
	Total Number of Green Bolls Retained after 30 Days + 4 Week Interval (GB)	Arizona	(TX2094xAcala Maxxa)F₂	4.27	2.11	0	11	49.41	231
		Iowa	(TX2094xAcala Maxxa)F₂	11.25	10.14	0	44	90.18	227
	Total Number of Bolls at 1st Day of 30-day Interval (NB)	Iowa	(TX2094xAcala Maxxa)F₂	18.03	11.74	0	55	65.13	226
	Total Number of Bolls at 30th Day of 30-day Interval	Iowa	(TX2094xAcala Maxxa)F₂	27.67	15.93	0	72	57.58	226
Flower	Petal Spot (PS; Presence '1'/Absence '0')	Arizona	Acala Maxxa	0	0	0	0	0	9
		Arizona	TX2094	1	0	1	1	0	9
		Arizona	(TX2094xAcala Maxxa)F₂	0.72	0.45	0	1	62.15	234
		Iowa	(TX2094xAcala Maxxa)F₂	0.75	0.43	0	1	57.52	226
	Pollen Color (PC; Yellow '1'/Cream '0')	Arizona	Acala Maxxa	0	0	0	0	0	9
		Arizona	TX2094	1	0	1	1	0	9
		Arizona	(TX2094xAcala Maxxa)F₂	0.94	0.25	0	1	26.23	234
		Iowa	(TX2094xAcala Maxxa)F₂	0.93	0.26	0	1	27.66	226
	Average Stigma Distance (SD, mm)	Arizona	(TX2094xAcala Maxxa)F₂	15.61	2.84	5.32	23.54	18.2	234
		Iowa	(TX2094xAcala Maxxa)F₂	16.55	3.52	7.5	28.33	21.28	229
	Curly Style (CS; Presence '1' /Absence '0')	Iowa	(TX2094xAcala Maxxa)F₂	0.2	0.4	0	1	198.25	226
Seed & Boll	50 Fuzzy Seed Weight (FSW; g)	Arizona	Acala Maxxa	6.03878	0.551112	4.9071	6.72414	9.13	9
		Arizona	TX2094	3.35678	0.89329	2.32143	4.76161	26.61	8
		Arizona	(TX2094xAcala Maxxa)F₂	4.13138	0.528682	2.8	5.84	12.8	231
		Iowa	(TX2094xAcala Maxxa)F₂	3.9643	0.52608	2.36	5.46	13.27	223
	50 Seed Weight (SW; g)	Arizona	Acala Maxxa	5.48111	0.297802	5.1	6.06	5.43	9
		Arizona	TX2094	2.9	0.914237	1.99	4.3	31.53	8
		Arizona	(TX2094xAcala Maxxa)F₂	3.69069	0.458049	2.72	4.97	12.41	231
		Iowa	(TX2094xAcala Maxxa)F₂	3.60494	0.476073	2.2	4.87	13.21	223
	Average Number of Locules (5 Bolls)	Arizona	Acala Maxxa	4.23333	0.264575	3.8	4.6	6.25	9
		Arizona	TX2094	3.55833	0.131586	3.4	3.66667	3.7	4
		Arizona	(TX2094xAcala Maxxa)F₂	3.86833	0.376014	2.67	4.8	9.72	233
		Iowa	(TX2094xAcala Maxxa)F₂	3.9463	0.312686	3	5	7.92	230
	Average Number of Mature Seeds (5 Bolls)	Arizona	Acala Maxxa	20.5611	4.8087	13	27.8	23.39	9
		Arizona	TX2094	10.9542	2.25361	8.75	13.3333	20.57	4
		Arizona	(TX2094xAcala Maxxa)F₂	19.1358	4.05324	8.8	30.4	21.18	233
		Iowa	(TX2094xAcala Maxxa)F₂	21.7127	4.2881	8.67	33.8	19.75	230
	Average Seeded Cotton Weight (SCW; g; 5 Bolls)	Arizona	Acala Maxxa	4.24278	0.987002	2.665	5.548	23.26	9
		Arizona	TX2094	0.627417	0.106322	0.515	0.75	16.95	4
		Arizona	(TX2094xAcala Maxxa)F₂	2.01172	0.46989	0.86	3.46	23.36	233
		Iowa	(TX2094xAcala Maxxa)F₂	2.38852	0.605586	0.66	4.46	25.35	230
	Average Boll Weight (BW; g; 5 Bolls)	Iowa	(TX2094xAcala Maxxa)F₂	3.06976	0.748548	0.99	5.64	24.38	230
	Average Weight of Locules (g; 5 Bolls)	Iowa	(TX2094xAcala Maxxa)F₂	0.685026	0.174144	0.3	1.18	25.42	230
Other fiber qualities	Number of Dust Particles per g (Dust Count by g)	Arizona	Acala Maxxa	495	184.42	286	821	37.26	9
		Arizona	(TX2094xAcala Maxxa)F₂	505.85	257.47	111	1301	50.9	124
		Iowa	(TX2094xAcala Maxxa)F₂	185.09	110.8	52	704	59.86	179
	Fineness (Fine; mTex)	Arizona	Acala Maxxa	155	5.85	147	164	3.77	10
		Arizona	(TX2094xAcala Maxxa)F₂	155.58	12.81	122	194	8.23	181
		Iowa	(TX2094xAcala Maxxa)F₂	145.94	14.42	107	185	9.88	187
	Immature Fiber Content (IFC; %)	Arizona	Acala Maxxa	8.39	1.62	4.57	10.57	19.36	10
		Arizona	(TX2094xAcala Maxxa)F₂	7.45	1.78	2.83	11.4	23.94	181
		Iowa	(TX2094xAcala Maxxa)F₂	7.75	2.34	3.13	12.77	30.14	187
	Maturity Ratio (MR)	Arizona	Acala Maxxa	0.88	0.04	0.82	0.97	4.61	10
		Arizona	(TX2094xAcala Maxxa)F₂	0.91	0.04	0.8	1.04	4.72	181
		Iowa	(TX2094xAcala Maxxa)F₂	0.89	0.05	0.78	1.02	5.77	187
	Nep Size (NS; μm)	Arizona	Acala Maxxa	719.67	41.33	676	798	5.74	9
		Arizona	(TX2094xAcala Maxxa)F₂	687.85	21.35	640	737	3.1	124
		Iowa	(TX2094xAcala Maxxa)F₂	679.65	19.44	618	741	2.86	179
	Neps per g	Arizona	Acala Maxxa	310	98.54	186	497	31.79	9
		Arizona	(TX2094xAcala Maxxa)F₂	352.13	129.23	120	660	36.7	124
		Iowa	(TX2094xAcala Maxxa)F₂	374.72	161.39	132	1016	43.07	177
	Seed Coat Nep Count per g (SCN Count by g)	Arizona	Acala Maxxa	29.22	7.89	18	41	26.99	9
		Arizona	(TX2094xAcala Maxxa)F₂	12.26	6.61	2	39	53.9	124
		Iowa	(TX2094xAcala Maxxa)F₂	8.6	5.14	2	34	59.84	179
	Seed Coat Nep Size (SCN Size; μm)	Arizona	Acala Maxxa	1150.67	175.87	873	1346	15.28	9
		Arizona	(TX2094xAcala Maxxa)F₂	1142.27	182.77	700	1664	16	124
		Iowa	(TX2094xAcala Maxxa)F₂	1174.25	204.86	693	1822	17.45	179
	Short Fiber Content by Number (SFCn; %)	Arizona	Acala Maxxa	32.9	8.97	19.7	47.27	27.26	10
		Arizona	(TX2094xAcala Maxxa)F₂	21.6	6.28	8.6	41.8	29.08	181
		Iowa	(TX2094xAcala Maxxa)F₂	22.97	6.47	10	48.17	28.15	187
	Short Fiber Content by Weight (SFCw; %)	Arizona	Acala Maxxa	9.84	3.04	5.3	14.77	30.9	10
		Arizona	(TX2094xAcala Maxxa)F₂	6.92	2.34	2.5	14.93	33.77	181
		Iowa	(TX2094xAcala Maxxa)F₂	7.41	2.5	3.4	17.2	33.78	187
	Total Count per g	Arizona	Acala Maxxa	616.44	210.41	347	938	34.13	9
		Arizona	(TX2094xAcala Maxxa)F₂	607.38	300.7	139	1506	49.51	124
		Iowa	(TX2094xAcala Maxxa)F₂	221.96	128.39	64	857	57.84	179
	Number of Trash Particles per g (Trash Count by g)	Arizona	Acala Maxxa	121.22	45.7	61	204	37.7	9
		Arizona	(TX2094xAcala Maxxa)F₂	106.31	54.44	24	265	51.21	124
		Iowa	(TX2094xAcala Maxxa)F₂	36.7	20.82	8	153	56.74	179
	Trash Size (TrS; μm)	Arizona	Acala Maxxa	365.89	53.27	308	470	14.56	9
		Arizona	(TX2094xAcala Maxxa)F₂	335.23	37.87	238	475	11.3	124
		Iowa	(TX2094xAcala Maxxa)F₂	356.92	66.24	227	586	18.56	179
	Visible Foreign Matter (VFM; %)	Arizona	Acala Maxxa	3.24	1.31	1.52	5.36	40.35	9
		Arizona	(TX2094xAcala Maxxa)F₂	2.54	1.17	0.47	6.3	46.1	124
		Iowa	(TX2094xAcala Maxxa)F₂	1.23	0.74	0.14	3.64	60.4	179
Fiber color	mean a*	Arizona	Acala Maxxa	0.13	0.09	-0.01	0.29	75.14	10
		Arizona	TX2094	6.51	0.3	6.27	6.84	4.57	3
		Arizona	(TX2094xAcala Maxxa)F₂	3.42	1.71	0.25	7.29	50.01	233
		Iowa	(TX2094xAcala Maxxa)F₂	3.3	1.83	0.07	7.52	55.48	226
	mean b*	Arizona	Acala Maxxa	7.46	0.66	6.64	8.9	8.81	10
		Arizona	TX2094	19.07	0.59	18.39	19.48	3.12	3
		Arizona	(TX2094xAcala Maxxa)F₂	14.39	3.82	6.27	21.27	26.57	233
		Iowa	(TX2094xAcala Maxxa)F₂	14.79	4.07	6.8	22.49	27.53	226
	mean L*	Arizona	Acala Maxxa	83.66	4	76.49	88.98	4.78	10
		Arizona	TX2094	64.53	0.75	63.67	65.08	1.16	3
		Arizona	(TX2094xAcala Maxxa)F₂	74.46	5.4	59.81	86.03	7.26	233
		Iowa	(TX2094xAcala Maxxa)F₂	74.56	6.48	60.12	87.28	8.68	226
Fiber length	Mean Length by Number (Ln; in)	Arizona	Acala Maxxa	0.76	0.1	0.62	0.91	12.48	10
		Arizona	(TX2094xAcala Maxxa)F₂	0.81	0.07	0.64	0.97	8.39	181
		Iowa	(TX2094xAcala Maxxa)F₂	0.81	0.07	0.56	0.98	8.92	187
	Coefficient of Variation of the Length by Number (LnCV; %)	Arizona	Acala Maxxa	60.2	9.7	46.2	75.9	16.12	10
		Arizona	(TX2094xAcala Maxxa)F₂	46.46	6.41	33.1	66.7	13.8	181
		Iowa	(TX2094xAcala Maxxa)F₂	48.43	6.31	34.6	72.73	13.02	187
	Mean Length by Weight (Lw; in)	Arizona	Acala Maxxa	1.03	0.05	0.97	1.11	4.52	10
		Arizona	(TX2094xAcala Maxxa)F₂	0.98	0.06	0.76	1.11	6.38	181
		Iowa	(TX2094xAcala Maxxa)F₂	1	0.07	0.82	1.16	7.04	187
	Coefficient of Variation of the Length by Weight (LwCV; %)	Arizona	Acala Maxxa	36.6	3.85	30	42.23	10.51	10
		Arizona	(TX2094xAcala Maxxa)F₂	32.86	2.97	26.83	42.17	9.04	181
		Iowa	(TX2094xAcala Maxxa)F₂	34.42	2.92	27.73	44.27	8.49	187
	2.5% Length by Number (L25n; %; in)	Arizona	Acala Maxxa	1.53	0.03	1.49	1.58	2	6
		Arizona	(TX2094xAcala Maxxa)F₂	1.42	0.09	1.1	1.63	6.51	114
		Iowa	(TX2094xAcala Maxxa)F₂	1.48	0.1	1.23	1.66	6.83	77
	5% Length by Number (L5n; %; in)	Arizona	Acala Maxxa	1.43	0.04	1.36	1.49	2.57	10
		Arizona	(TX2094xAcala Maxxa)F₂	1.32	0.09	0.98	1.52	6.72	181
		Iowa	(TX2094xAcala Maxxa)F₂	1.36	0.1	1.11	1.65	7.48	187
	Upper Quantile Length by Weight (UQLw; in)	Arizona	Acala Maxxa	1.28	0.03	1.21	1.33	2.66	10
		Arizona	(TX2094xAcala Maxxa)F₂	1.16	0.08	0.85	1.32	6.77	181
		Iowa	(TX2094xAcala Maxxa)F₂	1.19	0.09	0.98	1.43	7.66	187
